# Supplementary material for: Drosophila Distal-less and Rotund Bind a Single Enhancer Ensuring Reliable and Robust bric-a-brac2 Expression in Distinct Limb Morphogenetic Fields
Source: PubMed Central journal article supplement (PMC3694829; doi:10.1371/journal.pgen.1003581), 2013-06-27
Supplement: pgen.1003581.s002.pdf [file pgen.1003581.s002.pdf]

D.melanogaster 305 -----  
D.simulans 286 -----  
D.secchelia 264 -----  
D.yakuba 309 -----  
D.erecta 323 -----  
D.ficusphila 286 -----  
D.takahashii 281 -----  
D.elegans 309 -----  
D.kikkawai 276 -----  
D.rhopaloo 291 -----  
D.biarmipes 273 -----  
D.eugracilis 278 -----  
D.bipectinata 322 -----  
D.ananassae 316 -----  
D.pseudoobscura 297 -----  
D.persimilis 308 -----  
D.miranda 321 -----  
D.willistoni 316 -----  
D.mojavensis 920 AGTATTTTTATATGCTTATACAACCAATTCATCTGTTAATTTGTGCATTAACCTAATATAGCTATACCTAATATACCTATTTCCCGAGTTATGTTCTATAGAATC  
D.virilis 394 -----  
D.americana 408 -----  
D.grimshawi 414 -----

D.melanogaster 305 -----  
D.simulans 286 -----  
D.secchelia 264 -----  
D.yakuba 309 -----  
D.erecta 323 -----  
D.ficusphila 286 -----  
D.takahashii 281 -----  
D.elegans 309 -----  
D.kikkawai 276 -----  
D.rhopaloo 291 -----  
D.biarmipes 273 -----  
D.eugracilis 278 -----  
D.bipectinata 322 -----  
D.ananassae 316 -----  
D.pseudoobscura 297 -----  
D.persimilis 308 -----  
D.miranda 321 -----  
D.willistoni 316 -----  
D.mojavensis 1030 TTATCTTAAATCTAATCTATTTATTCATATTTATTAATATCTTTATAATCTTATGCATATCTGTTAATTTTGTATTAAATCTAATATATCTATATTTCCGAGTTAT  
D.virilis 394 -----  
D.americana 408 -----  
D.grimshawi 414 -----

D.melanogaster 305 -----  
D.simulans 286 -----  
D.secchelia 264 -----  
D.yakuba 309 -----  
D.erecta 323 -----  
D.ficusphila 286 -----  
D.takahashii 281 -----  
D.elegans 309 -----  
D.kikkawai 276 -----  
D.rhopaloo 291 -----  
D.biarmipes 273 -----  
D.eugracilis 278 -----  
D.bipectinata 322 -----  
D.ananassae 316 -----  
D.pseudoobscura 297 -----  
D.persimilis 308 -----  
D.miranda 321 -----  
D.willistoni 316 -----  
D.mojavensis 1140 GTCCCTTAAATCTAATCTTAAAGATCATCACAAAATTTGTCCAGAACAAATTTCTCTATAGTTTTAGTTTCTCTTAAGCTTGAGCGGTTATTCGTAGTCATTTTGA  
D.virilis 394 -----  
D.americana 408 -----  
D.grimshawi 414 -----

D.melanogaster 305 -----  
D.simulans 286 -----  
D.secchelia 264 -----  
D.yakuba 309 -----  
D.erecta 323 -----  
D.ficusphila 286 -----  
D.takahashii 281 -----  
D.elegans 309 -----  
D.kikkawai 276 -----  
D.rhopaloo 291 -----  
D.biarmipes 273 -----  
D.eugracilis 278 -----  
D.bipectinata 322 -----  
D.ananassae 316 -----  
D.pseudoobscura 297 -----  
D.persimilis 308 -----  
D.miranda 321 -----  
D.willistoni 316 -----  
D.mojavensis 1250 TCTCACTGCCATGCTCTTCTCGTTTTTTTGTCTAATTTTTTGGGGCGTTGGCCCG-CGGCT-  
D.virilis 394 -----  
D.americana 408 -----  
D.grimshawi 414 -----

D.melanogaster 360 -----  
D.simulans 341 -----  
D.secchelia 319 -----  
D.yakuba 364 -----  
D.erecta 377 -----  
D.ficusphila 343 -----  
D.takahashii 338 -----  
D.elegans 364 -----  
D.kikkawai 331 -----  
D.rhopaloo 346 -----  
D.biarmipes 328 -----  
D.eugracilis 336 -----  
D.bipectinata 377 -----  
D.ananassae 371 -----  
D.pseudoobscura 346 -----  
D.persimilis 357 -----  
D.miranda 370 -----  
D.willistoni 358 -----  
D.mojavensis 1328 -----  
D.virilis 449 -----  
D.americana 462 -----  
D.grimshawi 455 -----
